# Supplementary material for: Utilization of Primary Health Care Services in Communities of Enugu State, Nigeria
Source: Research Square preprint supplement (doi:10.21203/rs.3.rs-7880391/v1), 2026-02-11
Supplement: Supplementary file 1 [file 408b314d7da0a8cd6f2386c6.docx]

**QUESTIONNAIRE**

**PRIMARY HEALTHCARE SERVICES UTILIZATION IN COMMUNITIES IN ENUGU STATE.**

This is a study on the utilization of Primary Healthcare services in Rural and Urban communities in Enugu State. It is an academic project for the award of Master’s in Public Health at the University of Nigeria.

You are kindly required to answer the questions that will help the research in the course of this work. Kindly note that participation is voluntary. If there is any question you wish not to answer, you are free to decline, however, we encourage you answer all as your responses are confidential and a contribution to knowledge.

It will take 10-15 minutes of your time to fill the questionnaire. The outcome of the research shall help to assess the usage of Primary Healthcare and make recommendations to the State Government.

Thank You.

DO YOU CONSENT TO THIS STUDY? Yes [ ] No [ ]

**SECTION A: DEMOGRAPHY.**

1. SENATORIAL DISTRICT: Enugu East [ ] Enugu North [ ] Enugu West [ ]
2. NAME OF COMMUNITY: …………………………
3. GENDER: Male [ ] Female [ ]
4. AGE AT LAST BIRTHDAY: ………………….
5. RESIDENTIAL AREA: Rural [ ] Urban [ ]
6. RELIGION: Christianity [ ] Islam [ ] African Traditional Religion [ ]
7. LEVEL OF EDUCATION: None [ ] Completed Primary [ ] Secondary [ ] Tertiary [ ]

**SECTION B: RATE OF UPTAKE OF SERVICES AND QUALITY OF SERVICES OBTAINED IN A PHC**

1. Is there a PHC facility in your community? Yes [ ] No [ ]

1. What type of PHC facilities do you have available to you? Primary Health Center [ ] District Hospital [ ] Cottage Hospital [ ]. Private Health Facility [ ]
2. Do you have access to a Primary Healthcare Facility? Yes [ ] No [ ]
3. What is the distance to a Primary Healthcare Facility? 0-15 minutes [ ] 15-30 minutes [ ] 30 -45 minutes [ ] 45 minutes- 1 hour [ ] More than 1 hour [ ]
4. How often do you go to a Primary Healthcare facility? Very Often [ ] Sometimes [ ] Rarely [ ]
5. What is the cost of Treatment at the Primary Healthcare Facility? Affordable [ ] Expensive [ ].

1. Which services do you go to access at the Primary Healthcare Facility? Immunization of children [ ] Ante-natal Services [ ] Routine Checkup [ ] Disease Treatment for self [ ] Disease treatment for others [ ] Disease Prevention [ ]. Other services: …………
2. Using a scale of 1-5, having 1 as lowest and 5 as highest, kindly rate the following as obtainable in a Primary Healthcare:
   - 1. Access to diagnostic equipment: 1 [ ] 2 [ ] 3[ ] 4 [ ] 5 [ ]
     2. Access to Affordable drugs: 1 [ ] 2 [ ] 3[ ] 4 [ ] 5 [ ]
     3. Access to well-trained personnel: 1 [ ] 2 [ ] 3[ ] 4 [ ] 5 [ ]
     4. Staff behavior towards Patients: 1 [ ] 2 [ ] 3[ ] 4 [ ] 5 [ ]
3. Have you been referred to higher Hospitals before from the Primary Healthcare Facility? Yes [ ] No [ ]
4. When was the last time you used PHC facility? Less than 3 months [ ] 3-6 months ago[ ] 6 months-1 year ago [ ] More than a year ago [ ]

**SECTION C: PERSPECTIVE ON THE UTILIZATION OF PHC**

1. How satisfied are you with the level of PHC utilization in your area?

Very satisfied [ ] Satisfied [ ] NOT Satisfied [ ] Very displeasured [ ]

1. In your last visit to PHC, how do you consider the cost of drugs?

Affordable [ ] Costly [ ] Very costly [ ]

1. Do you think PHC is just for the poor and middle class?

Yes [ ] No [ ] I don’t know [ ].

1. Do you think there are suitable professionals in PHC as there are in other health facilities?

Yes [ ] No [ ] I don’t know [ ].

1. Do you think the Health workers are well trained for the job?

Yes [ ] No [ ] I don’t know [ ]

1. Do you consider the health workers competent?

Yes [ ] No [ ] I don’t know [ ]

**SECTION D: FACTORS AFFECTING THE UTILIZATION OF PHC**

1. Which of the following factors do you think affect the utilization of Primary Healthcare services?

Distance [ ] Cost of drugs and services [ ] Quality of services [ ] Lack of competent staff [ ]

1. Does your culture/faith permit the use of drugs and going to hospitals?

Yes [ ] No [ ] I don’t know [ ]

1. Have you lost someone at a PHC before?

Yes [ ] No [ ]

1. What number of days are your PHC open in a week?

Less than once a week [ ] 1-3 days a week [ ] 4-6 days [ ] Everyday [ ]

1. What number of hours do they open in a day?

Morning only [ ] Morning-Afternoon [ ] Morning – Evening [ ]

**SECTION E: FACTORS ENCOURAGING/ HINDERING THE USE OF PHC FACILITIES IN YOUR AREA**

1. Which of the following factors in your opinion encourage people in making use of the Primary Healthcare services?

Nearness to PHC facility [ ] Affordable or low cost of PHC services [ ] Friendly staff attitude [ ] Competent health staff [ ] Availability of laboratory facilities [ ] Availability of medicine in the Pharmacy [ ]

1. Which of the following factors hinders the use of PHC facilities in your area?

Far distance of PHC facility [ ] High cost of medicine and services [ ] Unfriendly attitude of health workers [ ] Lack of laboratory test services [ ] Medicines are usually out of stock [ ] Health care providers not always on duty [ ] Health facilities are not usually open [ ]
